# Supplementary material
Source: Elsevier journal article supplement (https://www.sciencedirect.com/science/article/pii/S2444883418300445)
Supplement: mmc1 [file S2444883418300445:mmc1.docx]

**Appendix**

**Macro Process Results (Hayes, 2013)**

Run MATRIX procedure:

************* PROCESS Procedure for SPSS Release 2.16.3 ******************

Written by Andrew F. Hayes, Ph.D. www.afhayes.com

**************************************************************************

Model = 6

Y = PromCVIS

X = PromECO

M1 = PromCOG

M2 = PromAFF

Sample size

292

**************************************************************************

Outcome: PromCOG

Model Summary

R R-sq MSE F df1 df2 p

,2505 ,0628 ,8318 19,4226 1,0000 290,0000 ,0000

Model

coeff se t p LLCI ULCI

constant 3,3007 ,1532 21,5386 ,0000 2,9991 3,6023

PromECO ,2003 ,0454 4,4071 ,0000 ,1108 ,2897

**************************************************************************

Outcome: PromAFF

Model Summary

R R-sq MSE F df1 df2 p

,5280 ,2787 ,6585 55,8463 2,0000 289,0000 ,0000

Model

coeff se t p LLCI ULCI

constant 1,2697 ,2198 5,7756 ,0000 ,8370 1,7024

PromCOG ,4134 ,0522 7,9121 ,0000 ,3106 ,5162

PromECO ,2005 ,0418 4,8007 ,0000 ,1183 ,2827

**************************************************************************

Outcome: PromCVIS

Model Summary

R R-sq MSE F df1 df2 p

,7005 ,4907 ,5274 92,5095 3,0000 288,0000 ,0000

Model

coeff se t p LLCI ULCI

constant ,3319 ,2078 1,5973 ,1113 -,0771 ,7409

PromCOG ,2275 ,0516 4,4101 ,0000 ,1259 ,3290

PromAFF ,5701 ,0526 10,8288 ,0000 ,4665 ,6737

PromECO ,0783 ,0388 2,0151 ,0448 ,0018 ,1547

************************** TOTAL EFFECT MODEL ****************************

Outcome: PromCVIS

Model Summary

R R-sq MSE F df1 df2 p

,3316 ,1099 ,9155 35,8180 1,0000 290,0000 ,0000

Model

coeff se t p LLCI ULCI

constant 2,5844 ,1608 16,0754 ,0000 2,2680 2,9008

PromECO ,2853 ,0477 5,9848 ,0000 ,1915 ,3792

***************** TOTAL, DIRECT, AND INDIRECT EFFECTS ********************

Total effect of X on Y

Effect SE t p LLCI ULCI

,2853 ,0477 5,9848 ,0000 ,1915 ,3792

Direct effect of X on Y

Effect SE t p LLCI ULCI

,0783 ,0388 2,0151 ,0448 ,0018 ,1547

Indirect effect(s) of X on Y

Effect Boot SE BootLLCIBootULCI

Total: ,2071 ,0350 ,1424 ,2803

Ind1 : ,0456 ,0164 ,0193 ,0847

Ind2 : ,0472 ,0139 ,0244 ,0794

Ind3 : ,1143 ,0279 ,0655 ,1755

(C1) -,0016 ,0165 -,0344 ,0321

(C2) -,0688 ,0346 -,1419 -,0043

(C3) -,0671 ,0320 -,1328 -,0067

Indirect effect key

Ind1 :PromECO ->PromCOG ->PromCVIS

Ind2 :PromECO ->PromCOG ->PromAFF ->PromCVIS

Ind3 :PromECO ->PromAFF ->PromCVIS

Specific indirect effect contrast definitions

(C1) Ind1 minus Ind2

(C2) Ind1 minus Ind3

(C3) Ind2 minus Ind3
